# Supplementary material
Source: MDPI journal article supplement (https://www.mdpi.com/2076-3417/9/16/3256)
Supplement: s1 [file s1]

## Supplementary Information

*Article*

# Multivariate statistical analysis of surface enhanced Raman spectra of human serum for Alzheimer's disease diagnosis

Elena Ryzhikova<sup>1</sup>, Nicole M. Ralbovsky<sup>1</sup>, Lenka Halámková<sup>1</sup>, Dzintra Celmins<sup>2</sup>, Paula Malone<sup>2</sup>, Eric Molho<sup>3</sup>, Joseph Quinn<sup>4</sup>, Earl A. Zimmerman<sup>2</sup> and Igor K. Lednev<sup>1,\*</sup>

<sup>1</sup> Department of Chemistry, University at Albany, SUNY, 1400 Washington Avenue, Albany, NY 12222, USA

<sup>2</sup> Alzheimer's Center and Movement Disorders Program, Department of Neurology of Albany Medical Center, Albany, NY 12208, USA

<sup>3</sup> Parkinson's Disease and Movement Disorders Center of Albany Medical Center, Albany, NY 12208, USA

<sup>4</sup> Layton Aging and Alzheimer's Center, Oregon Health & Science University, Portland, OR 97239, USA

\* Correspondence: ilednev@albany.edu; Tel.: (1-518-591-8863)

## Appendix A. The difference spectrum calculated between the different classes of average spectra, including $\pm 2$ standard deviations

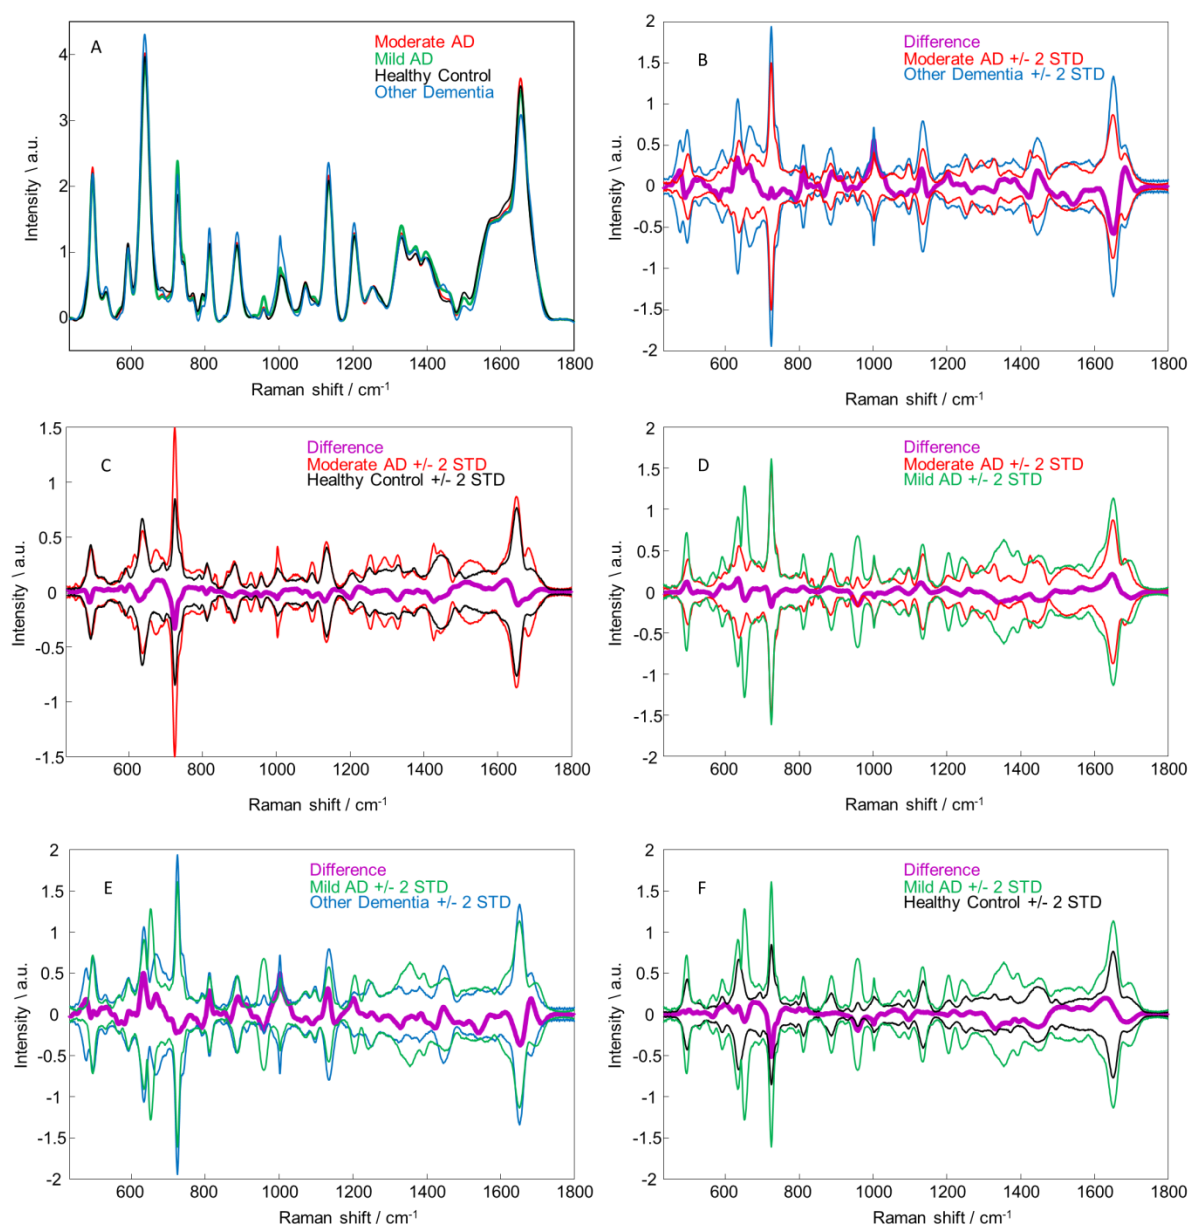

**Figure S.1** SERS of human blood serum. (a) Mean SERS spectra of human blood serum obtained for the mild AD (green line), moderate AD (red line), HC (black line) and OD (blue line) cohorts. Difference mean spectra (purple lines) and spectral variations around the mean ( $\pm 2$  STD) for: (b) moderate AD and OD; (c) moderate AD and HC; (d) moderate AD and mild AD; (e) mild AD and OD; and (f) mild AD and HC cohorts. Difference spectra were calculated using the mean SERS spectra of the compared groups. The difference spectra are displayed along with  $\pm$  two standard spectral deviations ( $\pm 2$ STD) for the groups that were compared.
